# Supplementary material for: Floatable artificial leaf to couple oxygen-tolerant CO2 conversion with water purification
Source: PubMed Central journal article supplement — Nat Commun. 2025 Jan 2;16:274. doi: 10.1038/s41467-024-55753-2 (PMC11696042; doi:10.1038/s41467-024-55753-2), 2025-01-02
Supplement: 41467_2024_55753_MOESM2_ESM.pdf [file 41467_2024_55753_MOESM2_ESM.pdf]

### Description of Additional Supplementary Files

**Supplementary Data 1** - This file encompasses the atomic coordinates for all pertinent computational models utilized in this study.

In-MOF-GO: The atomic coordinates of the computational models of In-MOF/GO.

In-MOF-GO-CO<sub>2</sub>: The atomic coordinates of the computational models of In-MOF/GO-CO<sub>2</sub>.

In-MOF-GO-COOH: The atomic coordinates of the computational models of In-MOF/GO-COOH.

In-MOF-GO-CO: The atomic coordinates of the computational models of In-MOF/GO-CO.

In-MOF-CO<sub>2</sub>: The atomic coordinates of the computational models of In-MOF-CO<sub>2</sub>.
